# Supplementary material for: Reviews and syntheses: Anthropogenic perturbations to carbon fluxes in Asian river systems: Concepts, emerging trends, and research challenges
Source: Copernicus journal article supplement (doi:10.5194/bg-2017-549), 2018-01-16

**bg-2017-549**

### **Author response to RC1**

This review article presents a very nice, pleasureable to read, comparative summary of CO<sub>2</sub> fluxes in some of the largest Asian Rivers. Or, to be more correct, it presents a summary of the existing knowledge and of the challenges remaining as at present there is much less information on carbon fluxes in these large systems that what is available for the large river systems in the US or Europe. The review covers a good range of the published research in the chosen river systems (Mekong, Yellow and Ganges rivers) and also discusses some of the data from other systems in the region.

#### **<Response>**

We thank the reviewer for the very positive evaluation of our manuscript.

This leads me to my main comment: I was wondering why the authors have not discussed the Red River in Vietnam or Pearl River in China? There is a body of work on both of these rivers. The authors don't need to go into great detail on the Red River, but I do think it merits a mention in the review.

#### **<Response>**

We have cited more papers on the Red and Pearl Rivers in relevant sections, including our data synthesis (Table 3; Fig. 4).

I found the figures to be appropriate but perhaps the quality of Fig. 3. could be improved.

#### **<Response>**

We have improved Fig. 3 by changing the font type and size of labels and the color of some figure components (see the revised figure on the next page).

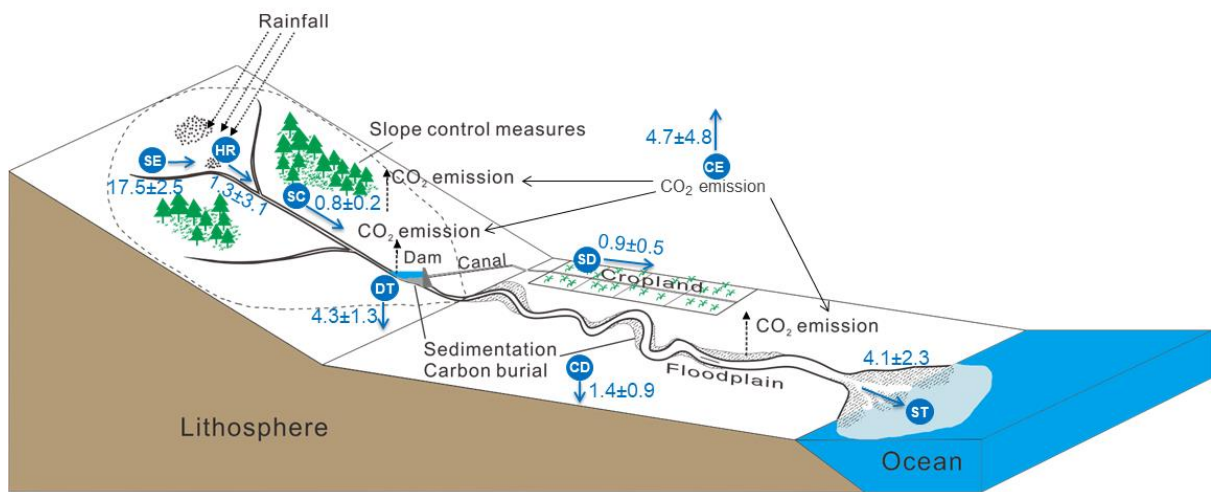

Supplement: Supplementary file [file bg-2017-549-AC1-supplement.pdf]
